# Supplementary material for: Quality evaluation and health risk assessment of drinking water in Minab County: hydrochemical analysis and artificial neural network modeling
Source: Royal Society of Chemistry journal article supplement (doi:10.1039/d3ew00525a), 2023-11-17
Supplement: d3ew00525a1.pdf [file d3ew00525a1.pdf]

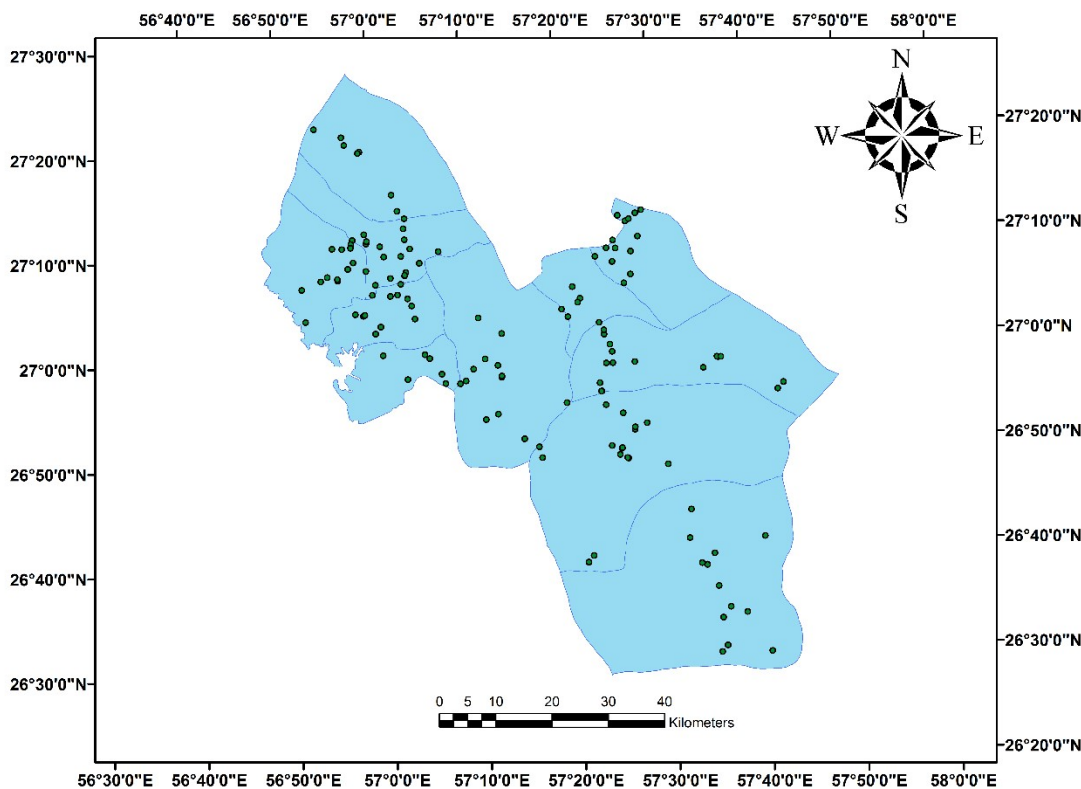

Figure 1- Location map of the study area showing the sampling stations

### Correlation Matrix

For investigating the relationship between the physicochemical parameters to determine the relationship between taken samples from study area, the correlation Matrix was used (Figure 2). Spearman correlation test was performed by the use of R software version 4.2.2. The strong correlations observed among groundwater parameters such as electrical conductivity (EC), total dissolved solids (TDS), chloride (Cl), sulfate ( $\text{SO}_4$ ), and sodium (Na) underscore the interplay of natural processes and anthropogenic activities shaping groundwater chemistry. Also, these strong correlations can be attributed to the costal location of the study area and penetration of the salty water of the sea to the fresh water of the aquifer. The strong relationship between EC and TDS ( $r=0.96$ ) reflects the fact that the quantity of



Figure 2-Correlation Matrix of parameters measured in drinking water of Minab county
